# Supplementary material for: Dispersive liquid–liquid microextraction followed by green high-performance liquid chromatography for fluconazole determination in cerebrospinal fluid with the aid of chemometric tools
Source: Royal Society of Chemistry journal article supplement (doi:10.1039/d0ay00704h), 2020-01-01
Supplement: d0ay00704h1.pdf [file d0ay00704h1.pdf]

### Electronic Supplementary Information (ESI)

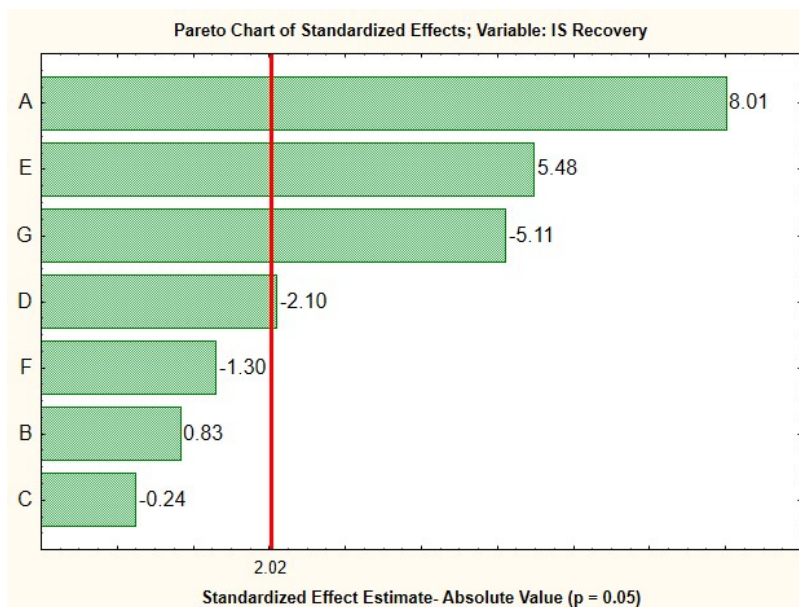

Figure 1S. Pareto graph for IS recovery. Red line defines a 95% confidence level. A = volume of chloroform, B = volume of isopropyl alcohol, C = NaCl (%), D = sample pH, E = agitation time, F = centrifugation time and G = 50 mM of sodium phosphate solution volume.

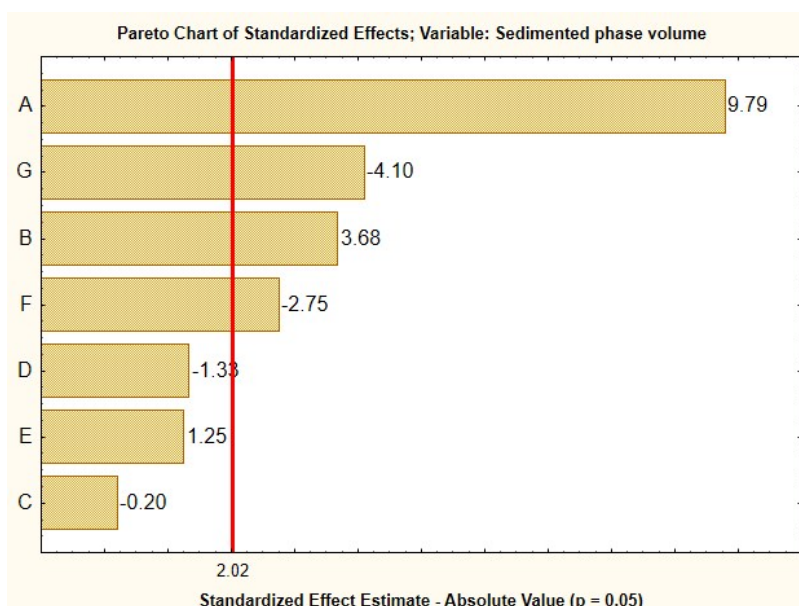

Figure 2S. Pareto graph for sedimented phase volume. Red line defines a 95% confidence level. A = volume of chloroform, B = volume of isopropyl alcohol, C = NaCl (%), D = sample pH, E = agitation time, F = centrifugation time and G = 50 mM of sodium phosphate solution volume.

Table 1S. Analysis of variance (ANOVA) for FFD – response is FLU recovery

| Variable | Sum of square | Degree of freedom | Mean square | F-value | <i>p</i> -value |
|----------|---------------|-------------------|-------------|---------|-----------------|
| A        | 12062.48      | 1                 | 12062.48    | 88.31   | 0.000           |
| B        | 530.34        | 1                 | 530.34      | 3.88    | 0.056           |
| C        | 9.92          | 1                 | 9.92        | 0.07    | 0.789           |
| D        | 344.83        | 1                 | 344.83      | 2.54    | 0.120           |
| E        | 1460.84       | 1                 | 1460.84     | 10.69   | 0.002           |
| F        | 150.77        | 1                 | 150.77      | 1.10    | 0.300           |
| G        | 8500.40       | 1                 | 8500.40     | 62.23   | 0.000           |
| Error    | 5327.11       | 39                | 136.59      |         |                 |
| Total    | 28276.89      | 46                |             |         |                 |
| R-square | 0.81          |                   |             |         |                 |

The variables colored in red are the ones with  $p$ -value  $\leq 0.05$ .

Table 2S. Analysis of variance (ANOVA) for CCD – response is FLU recovery

| Variable | Sum of square | Degree of freedom | Mean square | F-value | <i>p</i> -value |
|----------|---------------|-------------------|-------------|---------|-----------------|
| A (L)    | 5545.20       | 1                 | 5545.20     | 940.65  | 0.000           |
| A (Q)    | 262.99        | 1                 | 262.99      | 44.61   | 0.000           |
| E (L)    | 2.59          | 1                 | 2.59        | 0.44    | 0.510           |
| E (Q)    | 0.17          | 1                 | 0.17        | 0.03    | 0.867           |
| G (L)    | 19846.20      | 1                 | 19846.20    | 3366.58 | 0.000           |
| G (Q)    | 813.92        | 1                 | 813.92      | 138.07  | 0.000           |
| A by E   | 0.90          | 1                 | 0.90        | 0.15    | 0.698           |
| A by G   | 14.79         | 1                 | 14.79       | 2.51    | 0.120           |
| E by G   | 0.26          | 1                 | 0.26        | 0.04    | 0.836           |
| Error    | 294.75        | 50                | 5.90        |         |                 |
| Total    | 26885.60      | 59                |             |         |                 |
| R-square | 0.99          |                   |             |         |                 |

The variables colored in red are the ones with  $p$ -value  $\leq 0.05$ .

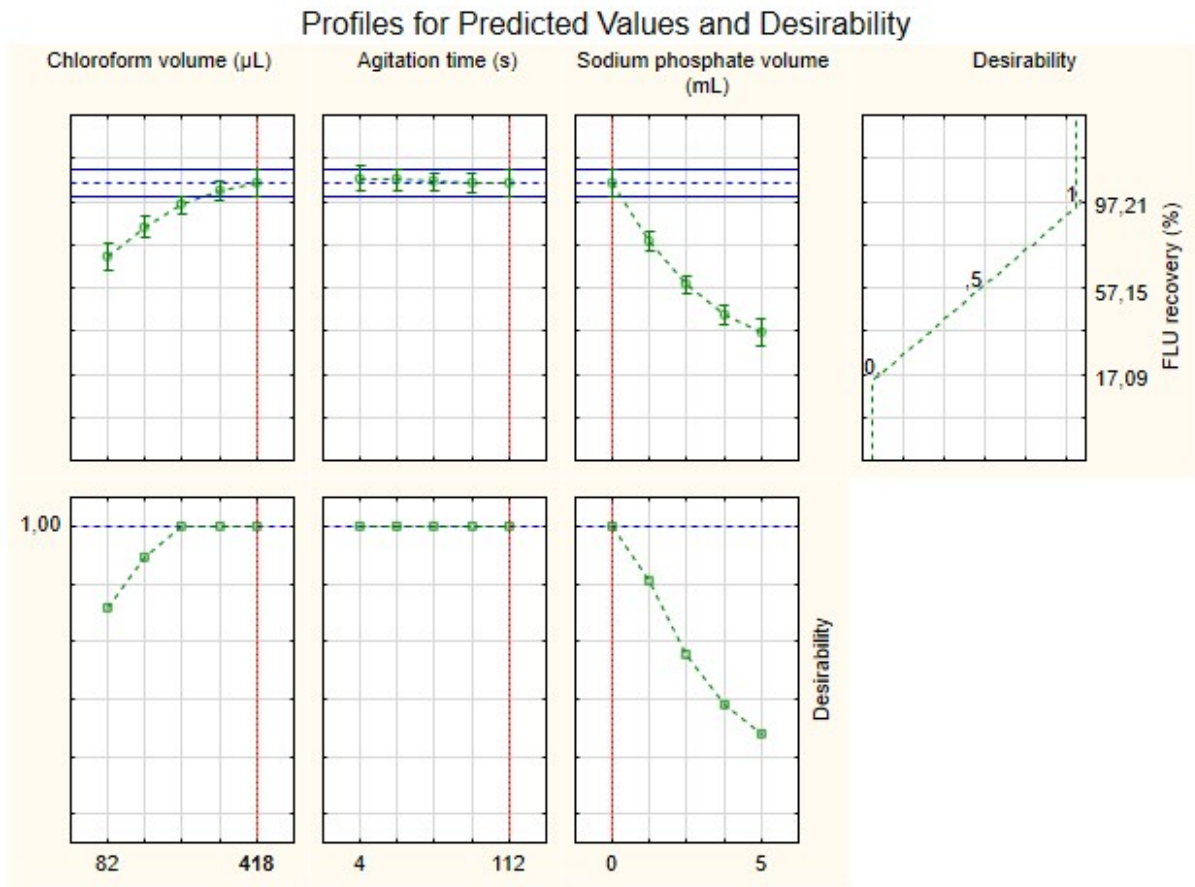

Figure 3S. Profiles for predict values and desirability function for FLU recovery (%). Red dashed lines indicate the optimum variables values that results in desirability of 1.0.
